# Supplementary material
Source: PubMed Central journal article supplement (PMC5734040)
Supplement: AEM.01965-17_zam001188225s1.pdf [file AEM.01965-17_zam001188225s1.pdf]

Table S1 List of CSCGs (conserved single-copy genes)

| CSCG       | ID    | Abbreviation  | AA length | Protein                                          |
|------------|-------|---------------|-----------|--------------------------------------------------|
| PF00162.14 |       | <i>pgkI</i>   | 384       | Phosphoglycerate kinase                          |
| PF00276.15 | 10140 | <i>rplW</i>   | 92        | Ribosomal protein L23                            |
| PF00281.14 | 10143 | <i>rplE</i>   | 56        | Ribosomal protein L5                             |
| PF00297.17 | 20028 | <i>rplC</i>   | 263       | Ribosomal protein L3                             |
| PF00347.18 | 10145 | <i>rplF</i>   | 77        | Ribosomal protein L6                             |
| PF00366.15 | 10140 | <i>rpsQ</i>   | 69        | Ribosomal protein S17                            |
| PF00380.14 | 10160 | <i>rpsI</i>   | 121       | Ribosomal protein S9/S16                         |
| PF00410.14 | 10144 | <i>rpsH</i>   | 129       | Ribosomal protein S8                             |
| PF00411.14 | 10153 | <i>rpsK</i>   | 110       | Ribosomal protein S11                            |
| PF00416.17 | 10152 | <i>rpsM</i>   | 106       | Ribosomal protein S13/S18                        |
| PF00466.15 | 20085 | <i>rplJ</i>   | 100       | Ribosomal protein L10                            |
| PF00573.17 | 20068 | <i>rplD</i>   | 192       | Ribosomal protein L4/L1 family                   |
| PF00750.14 | 20073 | <i>argS</i>   | 354       | arginine-tRNA ligase                             |
| PF01025.14 | 10207 | <i>grpE</i>   | 166       | GrpE                                             |
| PF01795.14 | 20029 | <i>mraW</i>   | 310       | rRNA small subunit methyltransferase             |
| TIGR00002  | 10213 | <i>rpsP</i>   | 78        | S16: ribosomal protein S16                       |
| TIGR00009  | 10224 | <i>rpmB</i>   | 58        | L28: ribosomal protein L28                       |
| TIGR00012  | 20089 | <i>rpmC</i>   | 56        | L29: ribosomal protein L29                       |
| TIGR00019  | 10101 | <i>prfA</i>   | 361       | peptide chain release factor 1                   |
| TIGR00029  | 10178 | <i>rpsT</i>   | 87        | S20: ribosomal protein S20                       |
| TIGR00043  | 10040 | <i>EcybeY</i> | 111       | metalloprotein, YbeY/UPF0054 family              |
| TIGR00059  | 10155 | <i>rplQ</i>   | 112       | ribosomal protein L17                            |
| TIGR00060  | 10146 | <i>rplR</i>   | 114       | ribosomal protein L18                            |
| TIGR00061  | 10183 | <i>rplU</i>   | 101       | ribosomal protein L21                            |
| TIGR00062  | 10182 | <i>rpmA</i>   | 83        | ribosomal protein L27                            |
| TIGR00064  |       | <i>ftsY</i>   | 279       | signal recognition particle-docking protein FtsY |
| TIGR00082  | 10030 | <i>rbfA</i>   | 115       | ribosome-binding factor A                        |
| TIGR00086  | 10122 | <i>smpB</i>   | 144       | SsrA-binding protein                             |
| TIGR00092  | 10045 | <i>engD</i>   | 368       | GTP-binding protein YchF, ribosome associated    |
| TIGR00115  | 10124 | <i>tig</i>    | 410       | trigger factor                                   |
| TIGR00116  | 10037 | <i>tsf</i>    | 293       | translation elongation factor Ts                 |
| TIGR00152  | 10084 | <i>coaE</i>   | 188       | dephospho-CoA kinase                             |
| TIGR00158  | 20019 | <i>rplK</i>   | 148       | ribosomal protein L9                             |
| TIGR00165  | 20081 | <i>rpsR</i>   | 70        | ribosomal protein S18                            |
| TIGR00166  | 20093 | <i>rpsF</i>   | 95        | ribosomal protein S6                             |
| TIGR00168  | 20024 | <i>infC</i>   | 165       | translation initiation factor IF-3               |
| TIGR00234  | 10001 | <i>tyrS</i>   | 406       | tyrosine--tRNA ligase                            |
| TIGR00337  | 20072 | <i>pyrG</i>   | 526       | CTP synthase                                     |
| TIGR00344  | 10130 | <i>(alaS)</i> | 847       | alaS: alanine--tRNA ligase                       |
| TIGR00362  | 20001 | <i>dnaA</i>   | 437       | chromosomal replication initiator protein DnaA   |
| TIGR00388  |       | <i>glyQS</i>  | 293       | glycine--tRNA ligase, alpha subunit              |
| TIGR00389  | 10186 | <i>glyR</i>   | 565       | glycine--tRNA ligase                             |

|           |       |             |     |                                                         |
|-----------|-------|-------------|-----|---------------------------------------------------------|
| TIGR00392 | 20033 | <i>ileS</i> | 861 | isoleucine--tRNA ligase                                 |
| TIGR00396 | 10059 | <i>leuS</i> | 843 | leucine--tRNA ligase                                    |
| TIGR00409 | 10195 | <i>proS</i> | 568 | proS fam II: proline--tRNA ligase                       |
| TIGR00414 | 20006 | <i>serS</i> | 418 | serine--tRNA ligase                                     |
| TIGR00418 | 20023 | <i>thrS</i> | 565 | threonine--tRNA ligase                                  |
| TIGR00420 |       | <i>trmU</i> | 351 | tRNA<br>(5-methylaminomethyl-2-thiouridylate)-methylase |
| TIGR00422 | 10180 | <i>valS</i> | 863 | valine--tRNA ligase                                     |
| TIGR00435 | 20015 | <i>cysS</i> | 466 | cysteine--tRNA ligase                                   |
| TIGR00436 | 10067 | <i>era</i>  | 270 | GTP-binding ribosome 16S and 30S maturation protein     |
| TIGR00442 | 10127 | <i>hisS</i> | 406 | histidine--tRNA ligase                                  |
| TIGR00459 | 10128 | <i>aspS</i> | 586 | aspartate--tRNA ligase                                  |
| TIGR00460 |       | <i>fmt</i>  | 315 | methionyl-tRNA formyltransferase                        |
| TIGR00468 | 20026 | <i>pheS</i> | 324 | phenylalanine--tRNA ligase, alpha subunit               |
| TIGR00472 | 20027 | <i>pheT</i> | 798 | pheT bact: phenylalanine--tRNA ligase, beta subunit     |
| TIGR00487 | 10031 | <i>infB</i> | 587 | translation initiation factor IF-2                      |
| TIGR00496 | 10034 | <i>frr</i>  | 176 | ribosome recycling factor                               |
| TIGR00575 | 10100 | <i>ligA</i> | 652 | DNA ligase, NAD-dependent                               |
| TIGR00631 |       | <i>uvrB</i> | 658 | uvrB: excinuclease ABC subunit B                        |
| TIGR00663 | 20002 | <i>dnaN</i> | 367 | DNA polymerase III, beta subunit                        |
| TIGR00775 | 10150 | <i>nhaD</i> | 420 | Na <sup>+</sup> /H <sup>+</sup> antiporter, NhaD family |
| TIGR00810 | 10117 | <i>secG</i> | 73  | preprotein translocase, SecG subunit                    |
| TIGR00855 | 20084 | <i>rplL</i> | 125 | ribosomal protein L7/L12                                |
| TIGR00922 | 20018 | <i>nusG</i> | 172 | transcription termination/antitermination factor        |
| TIGR00952 | 10028 | <i>rpsO</i> | 86  | ribosomal protein S15                                   |
| TIGR00959 |       | <i>ffh</i>  | 428 | ffh: signal recognition particle protein                |
| TIGR00963 | 10115 | <i>secA</i> | 787 | preprotein translocase, SecA subunit                    |
| TIGR00964 |       | <i>secE</i> | 57  | preprotein translocase, SecE subunit                    |
| TIGR00967 | 10149 | <i>secY</i> | 414 | preprotein translocase, SecY subunit                    |
| TIGR00981 | 10096 | <i>rpsL</i> | 124 | ribosomal protein S12                                   |
| TIGR01009 | 20063 | <i>rpsC</i> | 212 | ribosomal protein S3                                    |
| TIGR01011 | 10038 | <i>rpsB</i> | 225 | ribosomal protein S2                                    |
| TIGR01017 | 10002 | <i>rpsD</i> | 200 | ribosomal protein S4                                    |
| TIGR01021 | 10147 | <i>rpsE</i> | 156 | ribosomal protein S5                                    |
| TIGR01024 | 10054 | <i>rplS</i> | 114 | ribosomal protein L19                                   |
| TIGR01029 | 10097 | <i>rpsG</i> | 154 | ribosomal protein S7                                    |
| TIGR01030 | 10179 | <i>rpmH</i> | 44  | ribosomal protein L34                                   |
| TIGR01031 | 20028 | <i>rpmF</i> | 56  | ribosomal protein L32                                   |
| TIGR01032 | 20050 | <i>rplT</i> | 114 | ribosomal protein L20                                   |
| TIGR01044 | 20064 | <i>rplV</i> | 103 | ribosomal protein L22                                   |
| TIGR01049 | 20098 | <i>rpsJ</i> | 99  | ribosomal protein S10                                   |
| TIGR01050 | 20065 | <i>rpsS</i> | 92  | ribosomal protein S19                                   |
| TIGR01059 | 20004 | <i>gyrB</i> | 639 | DNA gyrase, B subunit                                   |

|           |       |              |      |                                                |
|-----------|-------|--------------|------|------------------------------------------------|
| TIGR01063 | 20005 | <i>gyrA</i>  | 800  | DNA gyrase, A subunit                          |
| TIGR01066 | 10159 | <i>rplM</i>  | 141  | ribosomal protein L13                          |
| TIGR01067 | 10141 | <i>rplNA</i> | 122  | ribosomal protein L14                          |
| TIGR01071 | 10148 | <i>rplO</i>  | 144  | ribosomal protein L15                          |
| TIGR01079 | 10142 | <i>rplX</i>  | 104  | ribosomal protein L24                          |
| TIGR01164 | 20062 | <i>rplP</i>  | 126  | ribosomal protein L16                          |
| TIGR01169 | 20020 | <i>rplA</i>  | 227  | ribosomal protein L1                           |
| TIGR01171 | 20066 | <i>rplB</i>  | 275  | ribosomal protein L2                           |
| TIGR01391 | 10185 | <i>dnaG</i>  | 414  | DNA primase                                    |
| TIGR01393 | 10055 | <i>lepA</i>  | 595  | GTP-binding protein LepA                       |
| TIGR01632 | 20019 | <i>rplK</i>  | 140  | ribosomal protein L11                          |
| TIGR01953 | 10032 | <i>nusA</i>  | 340  | transcription termination factor NusA          |
| TIGR02012 | 20044 | <i>recA</i>  | 321  | protein RecA                                   |
| TIGR02013 | 20071 | <i>rpoB</i>  | 1238 | DNA-directed RNA polymerase, beta subunit      |
| TIGR02027 | 10154 | <i>rpoA</i>  | 298  | DNA-directed RNA polymerase, alpha subunit     |
| TIGR02191 |       |              | 219  | RNaseIII: ribonuclease III                     |
| TIGR02350 | 10208 | <i>dnaK</i>  | 596  | chaperone protein DnaK                         |
| TIGR02386 | 20070 | <i>rpoC</i>  | 1147 | DNA-directed RNA polymerase, beta' subunit     |
| TIGR02397 | 20007 | <i>dnaX</i>  | 355  | DNA polymerase III, subunit gamma and tau      |
| TIGR02432 |       | <i>tilS</i>  | 189  | lysidine TilS N: tRNA(Ile)-lysidine synthetase |
| TIGR02729 | 10123 | <i>obgE</i>  | 329  | Obg CgtA: Obg family GTPase CgtA               |
| TIGR03263 | 20054 | <i>gmk</i>   | 180  | guanylate kinase                               |
| TIGR03594 | 20049 | <i>der</i>   | 432  | ribosome-associated GTPase EngA                |

The gene IDs were referred to the annotation of “*Ca. Spiroplasma holothuricola*” strain MT37 in MicroScope platform under accession number 9445. The shaded CSGCs could not be identified in the genome. The first number of gene IDs denotes the chromosome where the gene is located.

Table S2 Comparison of KEGG pathways.

| KEGG    |                                             | SH | BA | ME | ND | SD | SM | MBG |
|---------|---------------------------------------------|----|----|----|----|----|----|-----|
| ko      | Pathway                                     |    |    |    |    |    |    |     |
| ko01230 | Biosynthesis of amino acids                 | 4  | 62 | 25 | 10 | 20 | 42 | 12  |
| ko00010 | Glycolysis / Gluconeogenesis                | 1  | 14 | 14 | 1  | 27 | 8  | 22  |
| ko00020 | Citrate cycle (TCA cycle)                   | 0  | 5  | 7  | 0  | 5  | 9  | 2   |
| ko00500 | Starch and sucrose metabolism               | 2  | 4  | 2  | 0  | 35 | 0  | 33  |
| ko00520 | Amino sugar and nucleotide sugar metabolism | 2  | 8  | 5  | 0  | 18 | 0  | 29  |
| ko00190 | Oxidative phosphorylation                   | 1  | 18 | 15 | 2  | 1  | 0  | 4   |
| ko00564 | Glycerophospholipid metabolism              | 1  | 1  | 1  | 0  | 8  | 0  | 10  |
| ko00230 | Purine metabolism                           | 20 | 29 | 20 | 5  | 32 | 7  | 28  |
| ko00240 | Pyrimidine metabolism                       | 21 | 29 | 19 | 6  | 32 | 8  | 31  |
| ko00550 | Peptidoglycan biosynthesis                  | 0  | 13 | 7  | 0  | 1  | 0  | 0   |
| ko00760 | Nicotinate and nicotinamide metabolism      | 3  | 5  | 0  | 0  | 7  | 0  | 7   |
| ko00770 | Pantothenate and CoA biosynthesis           | 2  | 9  | 3  | 0  | 5  | 5  | 3   |
| ko00780 | Biotin metabolism                           | 0  | 6  | 4  | 0  | 0  | 0  | 0   |
| ko00900 | Terpenoid backbone biosynthesis             | 0  | 9  | 1  | 0  | 8  | 0  | 0   |
| ko00983 | Drug metabolism - other enzymes             | 6  | 1  | 0  | 0  | 9  | 0  | 5   |
| ko03010 | Ribosome                                    | 40 | 54 | 53 | 36 | 50 | 49 | 49  |
| ko00970 | Aminoacyl-tRNA biosynthesis                 | 22 | 23 | 22 | 8  | 27 | 7  | 24  |
| ko03060 | Protein export                              | 3  | 11 | 7  | 0  | 8  | 3  | 6   |
| ko02010 | ABC transporters                            | 7  | 4  | 9  | 0  | 14 | 0  | 10  |
| ko02060 | Phosphotransferase system (PTS)             | 0  | 5  | 5  | 0  | 21 | 0  | 30  |

SH: “*Ca. Spiroplasma holothuricola*”; BA: *Buchnera aphidicola*; ME: “*Ca. Moranella endobia*”; ND: “*Ca. Nasuia deltocephalinicola*”; SD: *Spiroplasma diminutum*; SM: “*Ca. Sulcia muelleri*”; MBG: *Mycoplasma* sp. Bg1.

Table S3 List of core genes

| Gene        | Syn3.0        | Spiroplasma               | Buchnera |
|-------------|---------------|---------------------------|----------|
| <i>dnaA</i> | MMSYN1 0001   | MT37 v2 20001             | BCc 004  |
| <i>dnaE</i> | MMSYN1 0612   | MT37 v2 10004             | BCc 148  |
| <i>dnaQ</i> | ≠             | ≠                         | BCc 156  |
| <i>dnaB</i> | MMSYN1 0609   | MT37 v2 20011             | BCc 359  |
| <i>dnaG</i> | MMSYN1 0406   | MT37 v2 10185             | BCc 035  |
| <i>dnaN</i> | MMSYN1 0002   | MT37 v2 20002             | BCc 003  |
| <i>dnaX</i> | MMSYN1 0047   | MT37 v2 20007             | BCc 300  |
| <i>polC</i> | MMSYN1 0303   | MT37 v2 10033             | ≠        |
| <i>gyrA</i> | MMSYN1 0007   | MT37 v2 20005             | BCc 116  |
| <i>gyrB</i> | MMSYN1 0006   | MT37 v2 20004             | BCc 002  |
| <i>holA</i> | MMSYN1 0826   | MT37 v2 10175             | BCc 275  |
| <i>holB</i> | MMSYN1 0044   | MT37 v2 20030             | BCc 219  |
| <i>ligA</i> | MMSYN1 0690   | MT37 v2 10100             | BCc 039  |
| <i>hup</i>  | MMSYN1 0350   | MT37 v2 20048             | BCc 084  |
| <i>ssb</i>  | (MMSYN1 0558) | MT37 v2 20082             | BCc 357  |
| <i>nth</i>  | ≠             | ≠                         | BCc 362  |
| <i>polA</i> | MMSYN1 0097   | MT37 v2 10218             | BCc 265  |
| <i>rpoA</i> | MMSYN1 0645   | MT37 v2 10154             | BCc 316  |
| <i>rpoB</i> | MMSYN1 0804   | MT37 v2 20071             | BCc 019  |
| <i>rpoC</i> | MMSYN1 0803   | MT37 v2 20070             | BCc 018  |
| <i>rpoD</i> | MMSYN1 0407   | MT37 v2 10184             | BCc 034  |
| <i>greA</i> | MMSYN1 0253   | MT37 v2 10204             | BCc 237  |
| <i>nusA</i> | MMSYN1 0300   | MT37 v2 10032             | BCc 232  |
| <i>nusB</i> | MMSYN1 0107   | MT37 v2 10092             | BCc 285  |
| <i>nusG</i> | MMSYN1 0840   | MT37 v2 20018             | BCc 024  |
| <i>deaD</i> | MMSYN1 0410   | 0                         | BCc 226  |
| <i>groL</i> | 0             | 0                         | BCc 011  |
| <i>groS</i> | 0             | 0                         | BCc 010  |
| <i>dnaK</i> | MMSYN1 0542   | MT37 v2 10208             | BCc 096  |
| <i>dnaJ</i> | MMSYN1 0541   | MT37 v2 10209             | BCc 095  |
| <i>grpE</i> | MMSYN1 0543   | MT37 v2 10207             | BCc 158  |
| <i>mnmA</i> | MMSYN1 0387   | 0                         | BCc 166  |
| <i>mnmE</i> | MMSYN1 0081   | promiscuous               | BCc 008  |
| <i>mnmG</i> | MMSYN1 0885   | 0                         | BCc 001  |
| <i>trmN</i> | MMSYN1 0043   | MT37 v2 10100             | BCc 112  |
| <i>tsaD</i> | MMSYN1 0079   | MT37 v2 10065             | BCc 037  |
| <i>tsaE</i> | MMSYN1 0270   | MT37 v2 10061             | BCc 235  |
| <i>pth</i>  | MMSYN1 0832   | N-terminal(MT37 v2 20089) | BCc 123  |
| <i>rnpA</i> | MMSYN1 0909   | MT37 v2 20021             | BCc 006  |
| <i>icsS</i> | MMSYN1 0441   | 0                         | BCc 391  |
| <i>orn</i>  | ≠             | ≠                         | BCc 373  |
| <i>nrnA</i> | MMSYN1 0139   | MT37 v2 10139             | ≠        |

|              |             |               |         |
|--------------|-------------|---------------|---------|
| <i>pnpA</i>  | 0           | MT37 v2 10200 | BCc 227 |
| <i>rne</i>   | ≠           | ≠             | 0       |
| <i>rnjA</i>  | MMSYN1 0600 | MT37 v2 20053 | ≠       |
| <i>rnjB</i>  | MMSYN1 0257 | MT37 v2 10199 | ≠       |
| <i>rnc</i>   | MMSYN1 0418 | ≠             | BCc 163 |
| <i>rny</i>   | MMSYN1 0359 | MT37 v2 20043 | ≠       |
| <i>rnr</i>   | MMSYN1 0775 | 0             | BCc 168 |
| <i>infA</i>  | MMSYN1 0649 | MT37 v2 94097 | BCc 195 |
| <i>infB</i>  | MMSYN1 0297 | MT37 v2 10031 | BCc 231 |
| <i>infC</i>  | MMSYN1 0200 | MT37 v2 20024 | BCc 079 |
| <i>fusA</i>  | MMSYN1 0150 | MT37 v2 10098 | BCc 344 |
| <i>tufA</i>  | MMSYN1 0151 | MT37 v2 10040 | BCc 343 |
| <i>tsf</i>   | MMSYN1 0539 | MT37 v2 10037 | BCc 143 |
| <i>prfA</i>  | MMSYN1 0141 | MT37 v2 10101 | BCc 111 |
| <i>prfB</i>  | 0           | 0             | BCc 269 |
| <i>frf</i>   | MMSYN1 0536 | MT37 v2 30027 | BCc 145 |
| <i>fnt</i>   | MMSYN1 0390 | 0             | BCc 314 |
| <i>def</i>   | MMSYN1 0201 | 0             | BCc 313 |
| <i>lepA</i>  | MMSYN1 0285 | MT37 v2 10055 | BCc 165 |
| <i>efp</i>   | MMSYN1 0391 | 0             | BCc 012 |
| <i>map</i>   | MMSYN1 0650 | MT37 v2 10151 | BCc 141 |
| <i>alaS</i>  | MMSYN1 0163 | MT37 v2 10130 | BCc 254 |
| <i>asnS</i>  | MMSYN1 0076 | MT37 v2 10104 | BCc 221 |
| <i>aspS</i>  | MMSYN1 0287 | MT37 v2 10128 | BCc 196 |
| <i>argS</i>  | MMSYN1 0535 | MT37 v2 20073 | BCc 152 |
| <i>cysS</i>  | MMSYN1 0837 | MT37 v2 20015 | BCc 306 |
| <i>glnS</i>  | 0           | 0             | BCc 263 |
| <i>gltX</i>  | MMSYN1 0126 | MT37 v2 20080 | BCc 042 |
| <i>glyS</i>  | ≠           | ≠             | BCc 085 |
| <i>glyQ</i>  | ≠           | ≠             | BCc 086 |
| <i>glyQS</i> | MMSYN1 0405 | MT37 v2 10186 | ≠       |
| <i>hisS</i>  | MMSYN1 0288 | MT37 v2 10127 | BCc 177 |
| <i>ileS</i>  | MMSYN1 0519 | MT37 v2 20033 | BCc 093 |
| <i>leuS</i>  | MMSYN1 0634 | MT37 v2 10059 | BCc 274 |
| <i>lysS</i>  | MMSYN1 0064 | MT37 v2 20060 | BCc 270 |
| <i>metG</i>  | MMSYN1 0012 | MT37 v2 20021 | BCc 072 |
| <i>pheS</i>  | MMSYN1 0529 | MT37 v2 20026 | BCc 082 |
| <i>pheT</i>  | MMSYN1 0528 | MT37 v2 20027 | BCc 083 |
| <i>proS</i>  | MMSYN1 0282 | MT37 v2 10195 | BCc 149 |
| <i>serS</i>  | MMSYN1 0061 | MT37 v2 20006 | BCc 193 |
| <i>thrS</i>  | MMSYN1 0222 | MT37 v2 20023 | BCc 078 |
| <i>trpS</i>  | MMSYN1 0308 | MT37 v2 10165 | BCc 350 |
| <i>tyrS</i>  | MMSYN1 0613 | MT37 v2 10001 | BCc 075 |
| <i>valS</i>  | MMSYN1 0260 | MT37 v2 10180 | BCc 223 |

|             |             |               |         |
|-------------|-------------|---------------|---------|
| <i>gatA</i> | MMSYN1 0688 | MT37 v2 10137 | 0       |
| <i>gatB</i> | MMSYN1 0687 | MT37 v2 10138 | 0       |
| <i>gatC</i> | MMSYN1 0689 | ?             | 0       |
| <i>rpsA</i> | 0           | 0             | BCc 190 |
| <i>rpsB</i> | MMSYN1 0540 | MT37 v2 10038 | BCc 142 |
| <i>rpsC</i> | MMSYN1 0665 | MT37 v2 20063 | BCc 335 |
| <i>rpsD</i> | MMSYN1 0238 | MT37 v2 10002 | BCc 317 |
| <i>rpsE</i> | MMSYN1 0654 | MT37 v2 10147 | BCc 324 |
| <i>rpsF</i> | MMSYN1 0027 | 0             | BCc 370 |
| <i>rpsG</i> | MMSYN1 0149 | MT37 v2 10097 | BCc 345 |
| <i>rpsH</i> | MMSYN1 0657 | MT37 v2 10144 | BCc 327 |
| <i>rpsI</i> | MMSYN1 0637 | MT37 v2 10160 | BCc 242 |
| <i>rpsJ</i> | MMSYN1 0672 | MT37 v2 20098 | BCc 342 |
| <i>rpsK</i> | MMSYN1 0646 | MT37 v2 10153 | BCc 318 |
| <i>rpsL</i> | MMSYN1 0148 | MT37 v2 10096 | BCc 346 |
| <i>rpsM</i> | MMSYN1 0647 | MT37 v2 10152 | BCc 319 |
| <i>rpsN</i> | MMSYN1 0658 | ?             | BCc 328 |
| <i>rpsO</i> | MMSYN1 0294 | MT37 v2 10028 | BCc 228 |
| <i>rpsP</i> | MMSYN1 0362 | MT37 v2 10213 | BCc 246 |
| <i>rpsQ</i> | MMSYN1 0662 | MT37 v2 10140 | BCc 332 |
| <i>rpsR</i> | MMSYN1 0025 | MT37 v2 20081 | BCc 369 |
| <i>rpsS</i> | MMSYN1 0667 | MT37 v2 20065 | BCc 337 |
| <i>rpsT</i> | MMSYN1 0082 | MT37 v2 10178 | BCc 094 |
| <i>rpsU</i> | MMSYN1 0482 | 0             | 0       |
| <i>rplA</i> | MMSYN1 0809 | MT37 v2 20020 | BCc 022 |
| <i>rplB</i> | MMSYN1 0668 | MT37 v2 20066 | BCc 338 |
| <i>rplC</i> | MMSYN1 0671 | MT37 v2 20028 | BCc 341 |
| <i>rplD</i> | MMSYN1 0670 | MT37 v2 20068 | BCc 340 |
| <i>rplE</i> | MMSYN1 0659 | MT37 v2 10143 | BCc 329 |
| <i>rplF</i> | MMSYN1 0656 | MT37 v2 10145 | BCc 326 |
| <i>rplG</i> | MMSYN1 0298 | 0             | 0       |
| <i>rplI</i> | MMSYN1 0833 | 0             | BCc 368 |
| <i>rplJ</i> | MMSYN1 0807 | MT37 v2 20085 | BCc 021 |
| <i>rplK</i> | MMSYN1 0810 | MT37 v2 20019 | BCc 023 |
| <i>rplL</i> | MMSYN1 0806 | MT37 v2 20084 | BCc 020 |
| <i>rplM</i> | MMSYN1 0638 | MT37 v2 10159 | BCc 243 |
| <i>rplN</i> | MMSYN1 0661 | MT37 v2 10141 | BCc 331 |
| <i>rplO</i> | MMSYN1 0653 | MT37 v2 10148 | BCc 322 |
| <i>rplP</i> | MMSYN1 0664 | MT37 v2 20062 | BCc 334 |
| <i>rplQ</i> | MMSYN1 0644 | MT37 v2 10155 | BCc 315 |
| <i>rplR</i> | MMSYN1 0655 | MT37 v2 10146 | BCc 325 |
| <i>rplS</i> | MMSYN1 0365 | MT37 v2 10054 | BCc 249 |
| <i>rplT</i> | MMSYN1 0198 | MT37 v2 20050 | BCc 081 |
| <i>rplU</i> | MMSYN1 0501 | MT37 v2 10183 | BCc 239 |

|              |             |               |         |
|--------------|-------------|---------------|---------|
| <i>rplV</i>  | MMSYN1 0666 | MT37 v2 20064 | BCc 336 |
| <i>rplW</i>  | MMSYN1 0669 | MT37 v2 10140 | BCc 339 |
| <i>rplX</i>  | MMSYN1 0660 | MT37 v2 10142 | BCc 330 |
| <i>rplY</i>  | 0           | 0             | BCc 088 |
| <i>rpmA</i>  | MMSYN1 0499 | MT37 v2 10182 | BCc 240 |
| <i>rpmB</i>  | MMSYN1 0422 | MT37 v2 20033 | BCc 052 |
| <i>rpmC</i>  | MMSYN1 0663 | MT37 v2 20089 | BCc 333 |
| <i>rpmD</i>  | 0           | 0             | BCc 323 |
| <i>rpmE</i>  | MMSYN1 0137 | MT37 v2 20083 | BCc 375 |
| <i>rpmF</i>  | MMSYN1 0526 | MT37 v2 20028 | 0       |
| <i>rpmG</i>  | 0           | 0             | BCc 051 |
| <i>rpmI</i>  | MMSYN1 0199 | MT37 v2 20049 | BCc 080 |
| <i>rpmJ</i>  | MMSYN1 0648 | Very short    | BCc 320 |
| <i>secA</i>  | MMSYN1 0095 | MT37 v2 10115 | BCc 130 |
| <i>secE</i>  | MMSYN1 0839 | 0             | BCc 025 |
| <i>secDF</i> | MMSYN1 0412 | 0             | 0       |
| <i>secY</i>  | MMSYN1 0650 | MT37 v2 10149 | BCc 321 |
| <i>ffh</i>   | MMSYN1 0360 | 0             | BCc 245 |

The background colors indicate different functional groups. ≠: unnecessary, may be replaced by other genes; ?: uncertain. The annotation of “*Ca. Spiroplasma holothuricola*” genome was performed in the MicroScope platform under accession number 9445.



Figure S1. Sampling of the sea cucumber in the Mariana trench.

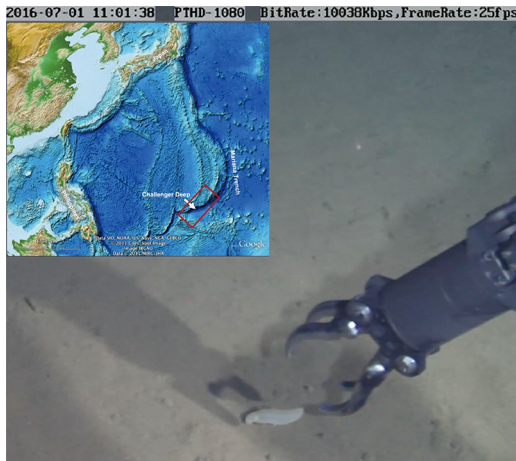

The sea cucumber was captured by a manned submersible at the southern slope of Challenger Deep (142°23', 10°89') at depth of 6140m. The inset map was adapted from Google Maps.

Figure S2. Binning of a genome from an unclassified bacterium

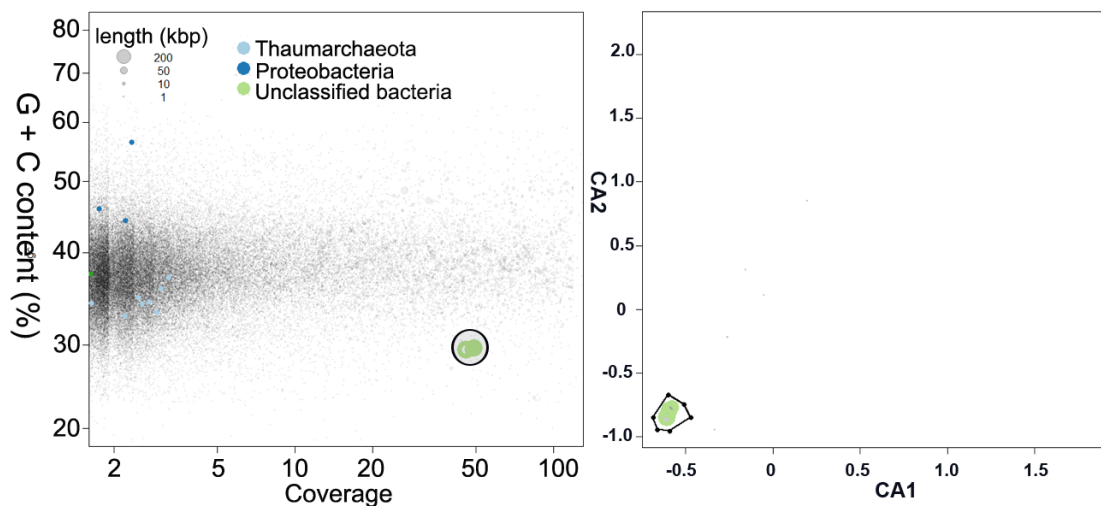

The assembled contigs for the metagenome from the hindgut were firstly separated with respect to their different G + C contents and coverage levels (X). Correspondence analysis (CA) further grouped the contigs based on their tetranucleotide frequencies. The contigs containing CSCGs for taxonomic assignment were colored to indicate their phyla. Three green contigs from unclassified bacteria were circled. The three contigs were manually checked for completeness. Two circular chromosomes were formed.

Figure S3. Phylogenetic position of “*Candidatus Spiroplasma holothuricola*” in Bacteria

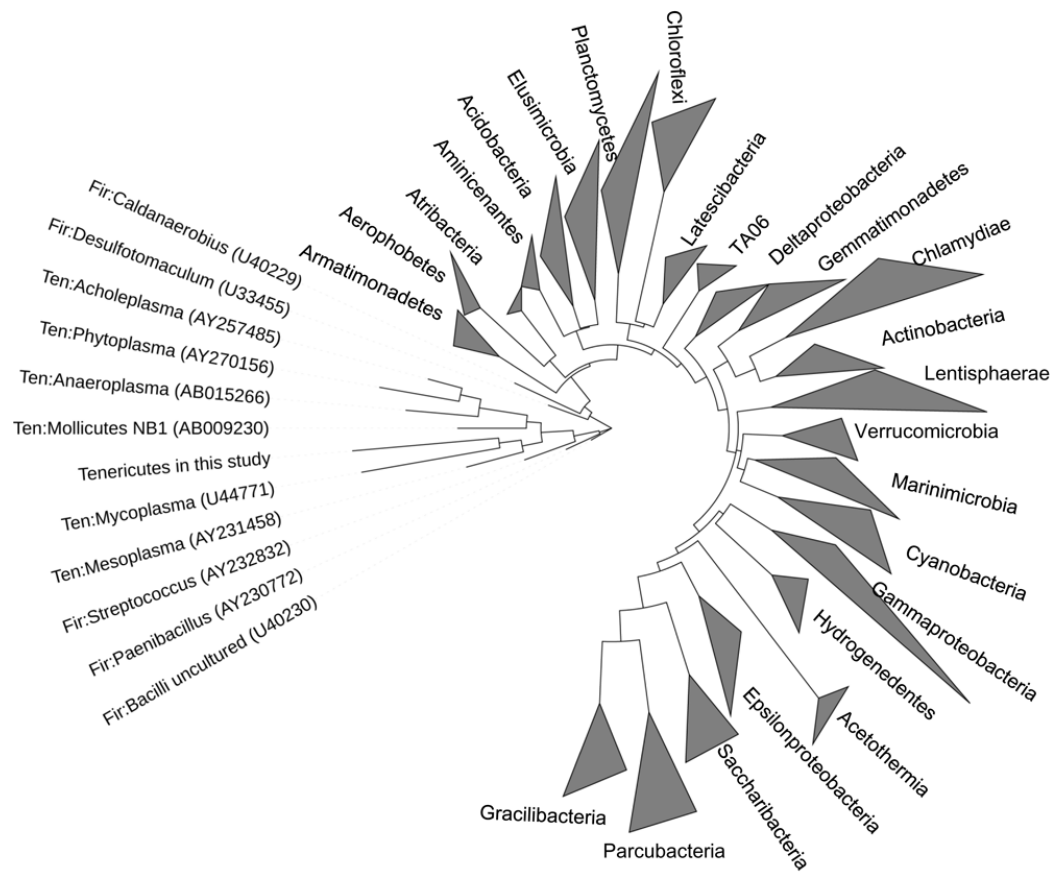

Representative 16S rRNA sequences for 27 bacterial phyla were used to construct a Maximum-likelihood tree. The sequences were mostly from different classes within a given phylum. Ten: Tenericutes; Fir: Firmicutes.

Figure S4. Phylogenetic relationships with Tenericutes groups

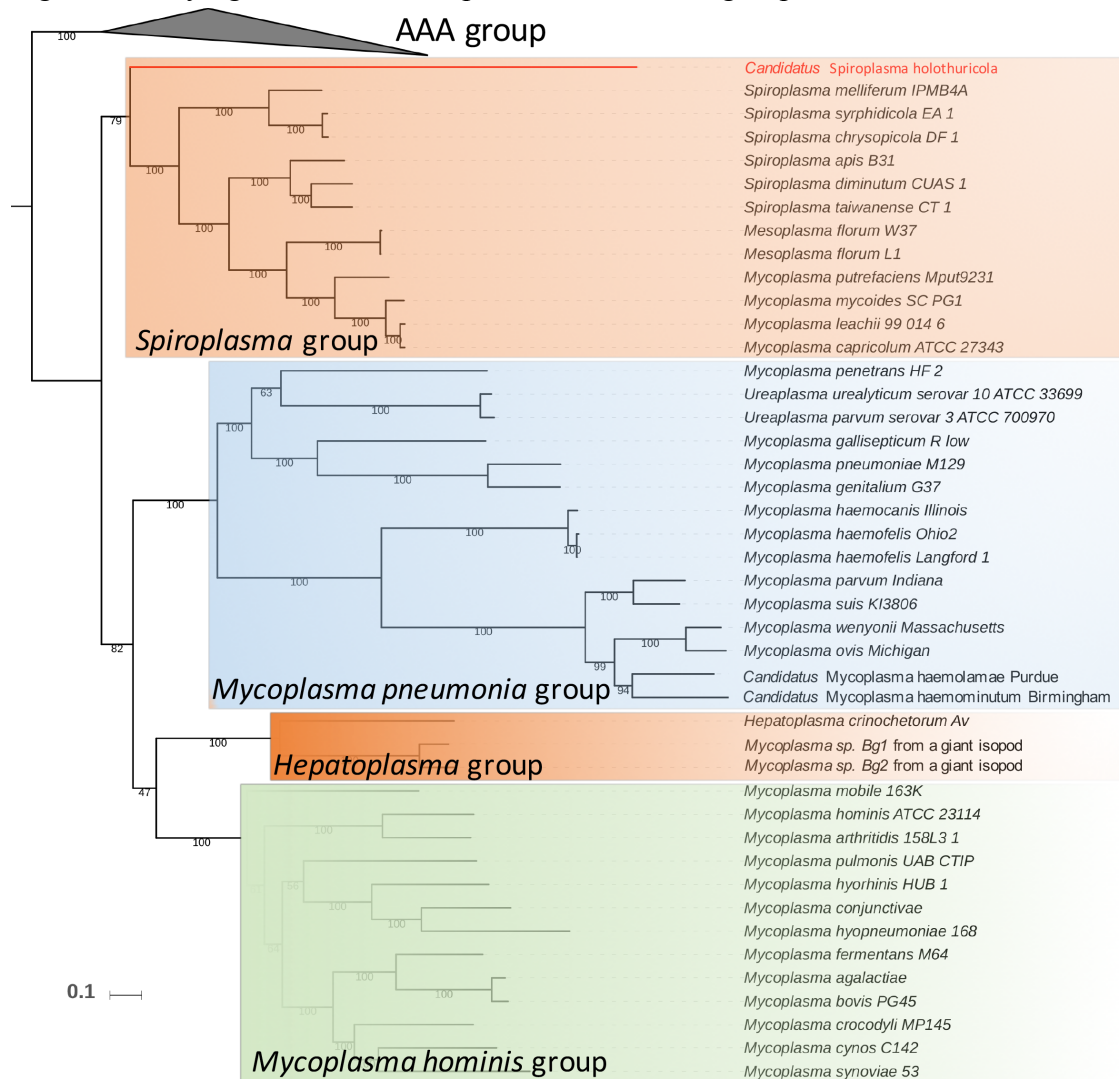

The maximal-likelihood tree was constructed using concatenated conserved proteins.

Figure S5. Alignment of PNPase proteins

```

|-----|-----|-----|-----|-----|
SM TVVLVTATVNNKLS--VDFPPLTVVFQEKLYSVGKI PGGFLKREGKPSSEYGTLSARVIG
EC TAVFVTV-VGQKAKPGQDFPLTVNYQERTYAAGRI PGSFRRREGRPSEGETLIARLIE
SH STVLVTVICIGKEKSK--NNWLPLTVDFQDNLYAAGKI PGSFRRREGKPSDFAVHSGRLIE
|-----|-----|-----|-----|-----|
SM RALRPLFSENFREVQIVINVLAVDNDNDVRMVS LFAASLALSISKIPFAGPVAGALVTV
EC RPIRPLFPEGFVNEVQVIATVVSVPQVNPDI VAMIGASAALSLSGIPFNGPIGAARVGY
SH RSIIRNIFPKNFRNDVQIIIVEPLSDYSIDIRT VSLFAVSLALNCSSLPFSLPIAGVVVAC
  RBR1
|-----|-----|-----|-----|-----|
SM DQKNNIIINPTLEQINDGQMEELIVAGTAEAINMVEAGAKEVSENMLQAILAGHDVIQQL
EC -INDQYVLNPTQDELKESKLDLVVAGTEAAVLMVSEQAQLLEDQMLGAVVFGHEQQQVV
SH -IKGEFVKVNPTEAEMADSELEMFVSGTKDKINI IEISANQLPEDQILKAIELAHSTIIEI
|-----|-----|-----|-----|-----|
SM IAFQHEIIIAKVGVPKMEVELFQVRPEIITYVNNYAKDLITAARIKEKTKRYETIEHLIE
EC IQNINELVKEAGKPRWDWQPEPVNEALNARVAALAEARLSDAYRITDKQERYAQVDVIKS
SH LKIEEKVIADFPKTKADHFYEEINPDFHKVAIKKYYKQILALINDSDNQARDQNSKLLK
|-----|-----|-----|-----|-----|
SM QAINNYPMPVSLSEKEQKQLTVELKTA-LHNIIRQEVRRQILIDKTRLDGRKLDQIRPLS
EC ETI-----ATLLAEDETLDENELGEI-LHAIEKNVVRSRVLAGEPRIDGREKDMIRGLD
SH EIIINDH-----AGDSESFCEPMMSIWFESVIREELRKTIKDKSRIDGRKFEEIRPID
|-----|-----|-----|-----|-----|
SM SEIDLIPVHGSALFTRGETQVLSVVTLGALGENQIIDGITDEEGKRFMHYHNFPAFVSG
EC VRTGVLPRTHGSALFTRGETQALVTATLGTARDAQVLDDELMGERTDTFLFHYNFPYVSVG
SH SAVDLIPVHGSGLFSRGLTQTLIIITLGPMSDNQLIDDLTKEQSKRFIYHYKSLPFSFG
|-----|-----|-----|-----|-----|
SM ETGRMGPPSRREHGALGELKALLQIIPSEKVFYITRIVSEVLESNGSSTQASICAATL
EC ETGMVSPKRRREHGRLAKRGLVAVMPDMDKFPYTVRVVSEITE SNGSSMASVCGASL
SH QVSSIRGVSRREHGGLYKALKWVLPSSDDFPYTLRVSEVMSSNGSSTQASICSASL
  RBR1
|-----|-----|-----|-----|-----|
SM ALMAAGVPIITAPVVGIAMGLIKEKNYITLTDIQMDEHLGDMDFK VAGTATGICALQMD
EC ALMDAGVPIKAAVAGIAMGLVKEGDNYVVLSDILGPEHLGDMDFK VAGSRDGISALQMD
SH GLMAAGVPLTGHVAGTATGLIKQDDQYHLLTDIQAWEHLGDMDFK VAGTKKGVCSVQID
  MBR

```

The alignment shows the four conserved domains in PNPase proteins from *Spiroplasma melliferum* (SM), *Escherichia coli* strain K12 (EC) and “*Ca. Spiroplasma holothuricola*” (SH).

Figure S6. Genomic variations as shown by different levels of the contigs.

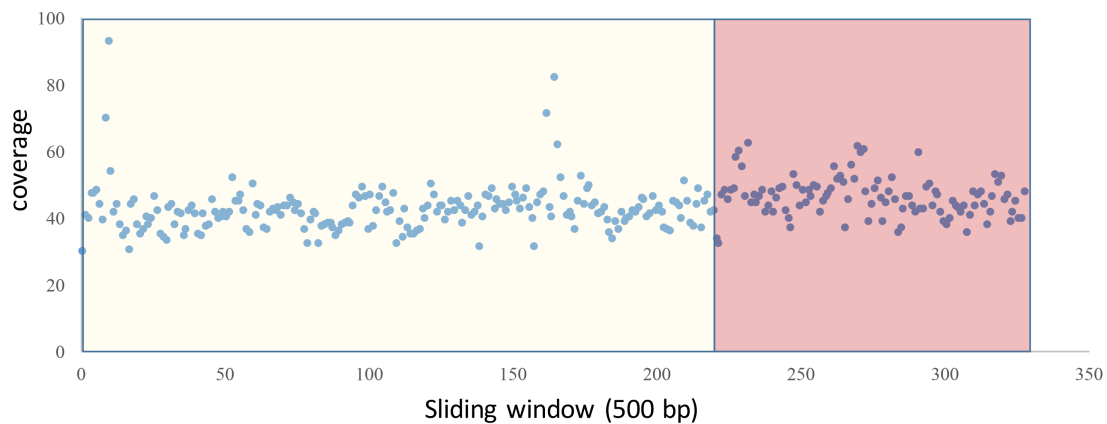

The two contigs in the draft genome were framed in different colors. In every 500bp, coverage by Illumina reads was estimated in the sliding window that was moved 250bp in each step. Average coverage was indicated by a red dashed line at 44.5 with a standard deviation of 11.8. The genomic regions with a relative low coverage were not perfectly aligned by the reads, indicating the presence of genetic variations or gene depletions among the individual spiroplasmas dwelling in hindgut of the sea cucumber.
